# Supplementary material
Source: publisher figshare collection journal article supplement (https://sage.figshare.com/ndownloader/files/20045762)
Supplement: Supplementary file 1 [file 20045762]

Supplemental Table. Conditional Probabilities of the 2-Latent-Class-Analytic Model of Experiencing Physical-Health Symptoms During the Past 30 Days ( $N = 512$ ).

|                                        | Conditional Probabilities          |                            |
|----------------------------------------|------------------------------------|----------------------------|
|                                        | Occasionally Sick<br>( $n = 193$ ) | Healthier<br>( $n = 319$ ) |
| Headaches or migraines                 | <b>.86</b>                         | <b>.58</b>                 |
| Dizziness or Faintness                 | <b>.61</b>                         | .16                        |
| Watery or itchy eyes                   | <b>.80</b>                         | .44                        |
| Rashes or ear infections               | .22                                | .06                        |
| Sinus problems                         | <b>.64</b>                         | .32                        |
| Hay Fever                              | <b>.51</b>                         | .22                        |
| Chronic coughing                       | .34                                | .10                        |
| Sore throat, hoarseness, loss of voice | .36                                | .15                        |
| Canker sores                           | .20                                | .12                        |
| Hives, rashes, dry skin                | .41                                | .15                        |
| Flushing, hot flashes                  | .35                                | .07                        |
| Asthma                                 | .22                                | .05                        |
| Bronchitis                             | .08                                | .01                        |
| Difficulty breathing                   | .30                                | .08                        |
| Nausea vomiting (not deliberate)       | .38                                | .10                        |
| Heartburn                              | <b>.51</b>                         | .26                        |
| Intestinal/stomach pain                | <b>.58</b>                         | .23                        |
| Pain or aches in joints                | <b>.73</b>                         | .34                        |
| Pain or aches in muscles               | <b>.73</b>                         | .34                        |
| Fatigue, sluggishness                  | <b>.98</b>                         | <b>.67</b>                 |
| Hyperactivity                          | .36                                | .15                        |
| Restlessness                           | <b>.82</b>                         | .43                        |
| General Health Good or Better          | <b>.63</b>                         | <b>.91</b>                 |

*Note.* Conditional probabilities greater than .50 are in bold to ease interpretation.
